# Supplementary material
Source: PubMed Central journal article supplement (PMC2693252)

**Supplementary Figure 1: Differential Localization of H3K27me1 and H3K27me3**

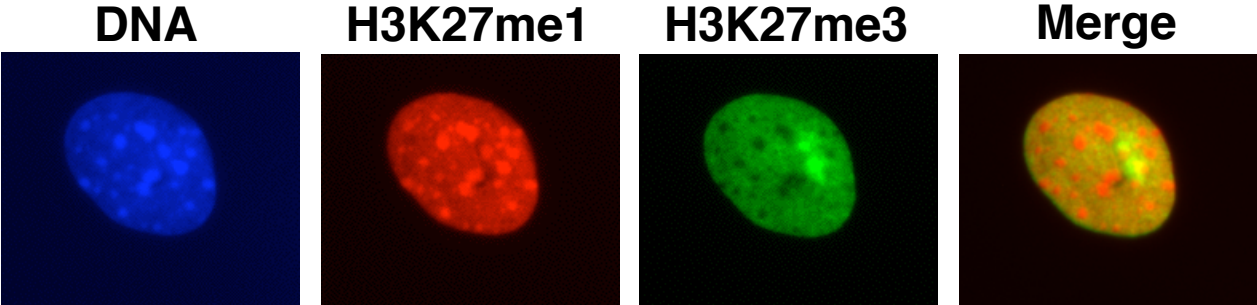

Supplement: NIHMS35411-supplement-01.pdf [file NIHMS35411-supplement-01.pdf]

**Supplementary Figure 2: Colocalization of H3K27me2 and H3K27me3**

**DNA**

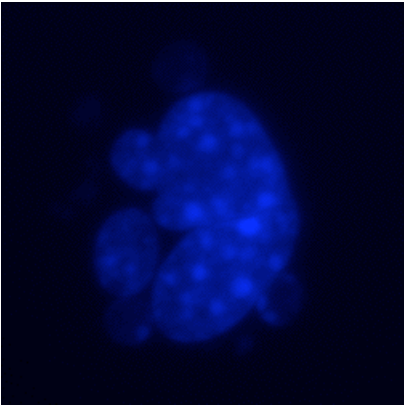

**H3K27me2**

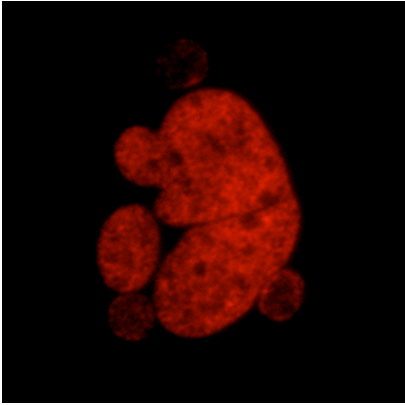

**H3K27me3**

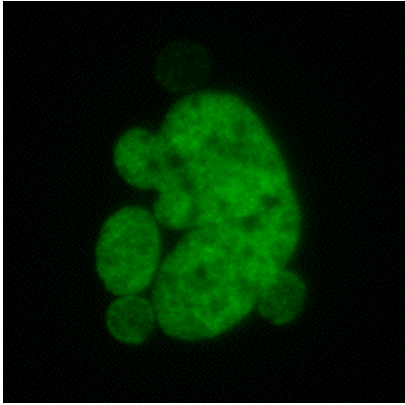

**Merge**

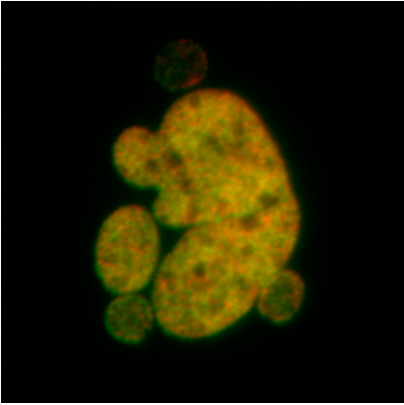

Supplement: NIHMS35411-supplement-02.pdf [file NIHMS35411-supplement-02.pdf]

### Supplementary Figure 3: EED putative start sites and motifs

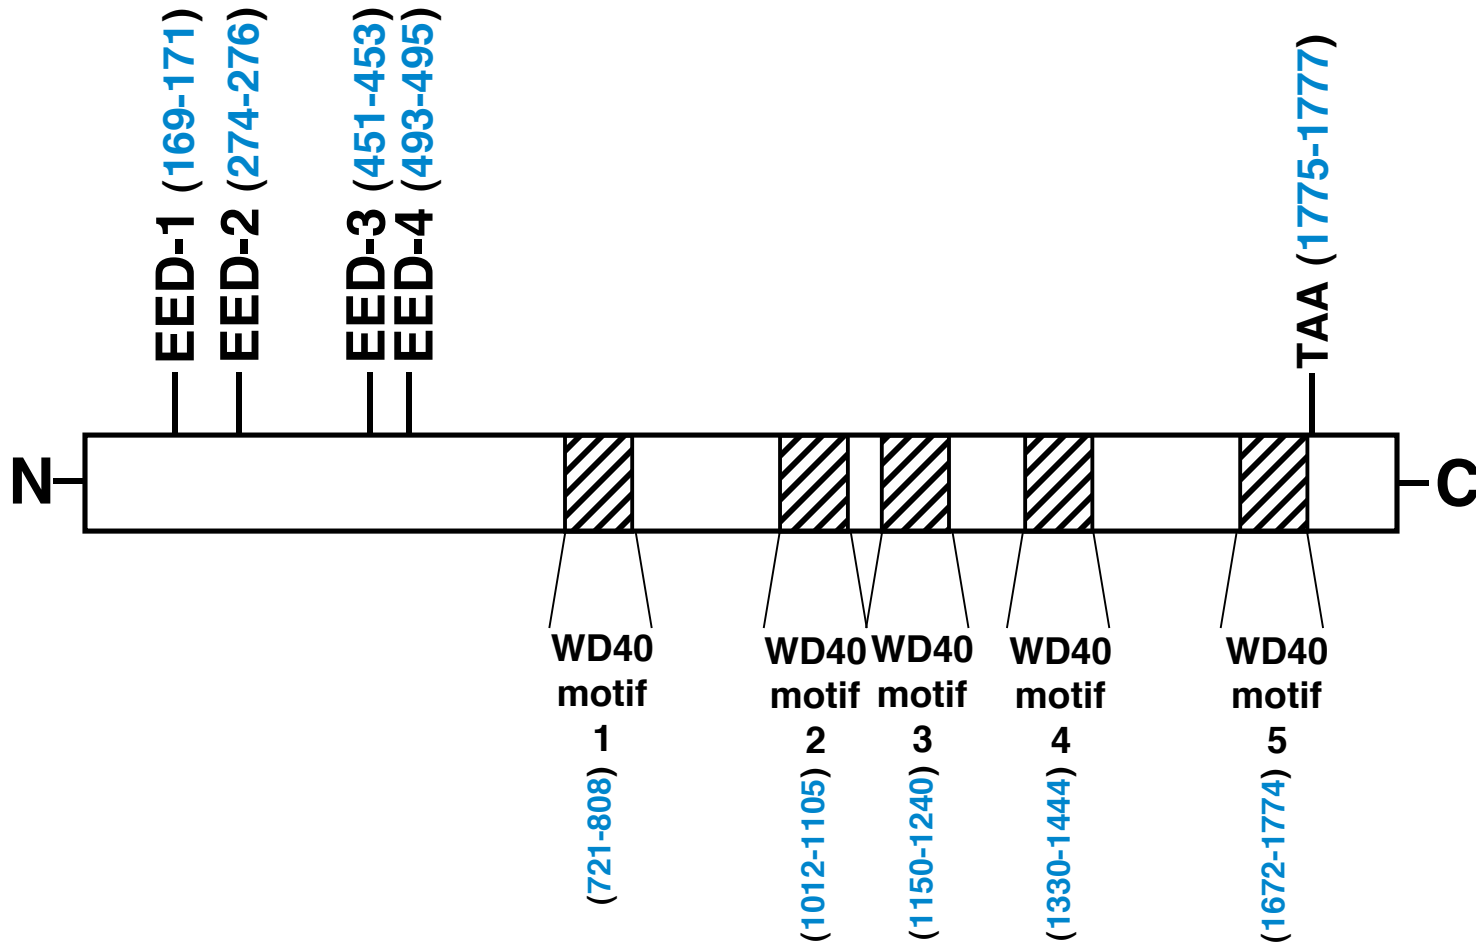

Supplement: NIHMS35411-supplement-03.pdf [file NIHMS35411-supplement-03.pdf]
